Supplementary Table S1 – Cardiac junctin constructs – Note that sheep cardiac junctin is only partially sequenced.  
Therefore comparison of identity and homology is given with the equivalent region of human and canine cardiac junctin in **A**.  
Comparison of identity and homology of full human with canine junctin in **B**.  
Comparison of canine Cjun identity and homology with human or rabbit Cjun in **C**.  
Identity and homology values obtained using BLASTP 2.2.30+.

| <b>A FLjun</b>               | Corresponding canine FLjun |          |  | Corresponding human junctin |          |
|------------------------------|----------------------------|----------|--|-----------------------------|----------|
|                              | identity                   | homology |  | identity                    | homology |
| Partial rabbit cardiac FLjun | 74%                        | 83%      |  | 77%                         | 84%      |

| <b>B FLjun</b> | Canine junctin |          |
|----------------|----------------|----------|
|                | identity       | homology |
| Human junctin  | 85%            | 91%      |

| <b>C Cjun</b>        | Equivalent human Cjun |          |  | Equivalent rabbit Cjun |          |
|----------------------|-----------------------|----------|--|------------------------|----------|
|                      | identity              | homology |  | identity               | homology |
| Canine Cjun (45-210) | 83%                   | 90%      |  | 72%                    | 82%      |

Supplementary Table S2. Comparison of sequence identity and homology in indicated species.

RyR1 (**A**) or RyR2 (**B**)

**A**

| RyR1   | Human    |          | Rabbit   |          | Sheep    |          | Canine   |          | Mouse    |          |
|--------|----------|----------|----------|----------|----------|----------|----------|----------|----------|----------|
|        | identity | homology | identity | homology | identity | homology | identity | homology | identity | homology |
| Human  | 100%     | 100%     | 96%      | 97%      | 93%      | 94%      | 97%      | 97%      | 95%      | 97%      |
| Rabbit | 96%      | 97%      | 100%     | 100%     | 94%      | 95%      | 97%      | 97%      | 96%      | 97%      |
| Sheep  | 93%      | 94%      | 94%      | 95%      | 100%     | 100%     | 94%      | 95%      | 92%      | 94%      |
| Canine | 97%      | 97%      | 97%      | 97%      | 94%      | 95%      | 100%     | 100%     | 97%      | 98%      |
| Mouse  | 95%      | 97%      | 96%      | 97%      | 92%      | 94%      | 97%      | 98%      | 100%     | 100%     |

**B**

| RyR2   | Human    |          | Rabbit   |          | Sheep    |          | Canine   |          | Mouse    |          |
|--------|----------|----------|----------|----------|----------|----------|----------|----------|----------|----------|
|        | identity | homology | identity | homology | identity | homology | identity | homology | identity | homology |
| Human  | 100%     | 100%     | 99%      | 99%      | 98%      | 98%      | 98%      | 99%      | 97%      | 98%      |
| Rabbit | 99%      | 99%      | 100%     | 100%     | 97%      | 98%      | 98%      | 98%      | 97%      | 98%      |
| Sheep  | 98%      | 98%      | 97%      | 98%      | 100%     | 100%     | 98%      | 99%      | 96%      | 98%      |
| Canine | 98%      | 99%      | 98%      | 98%      | 98%      | 99%      | 100%     | 100%     | 97%      | 98%      |
| Mouse  | 97%      | 98%      | 97%      | 98%      | 96%      | 98%      | 97%      | 98%      | 100%     | 100%     |

Supplementary Table S3 – RyR1 constructs – regions in human and canine aligned with given rabbit residues

|                  | Human    |          |  | Canine   |          |
|------------------|----------|----------|--|----------|----------|
|                  | identity | homology |  | identity | homology |
| Rabbit 1-5037    | 96%      | 97%      |  | 97%      | 97%      |
| Rabbit 1-182     | 98%      | 98%      |  | 98%      | 97%      |
| Rabbit 1-2156    | 95%      | 97%      |  | 96%      | 97%      |
| Rabbit 1-1078    | 97%      | 98%      |  | 97%      | 98%      |
| Rabbit 1079-2156 | 93%      | 96%      |  | 94%      | 96%      |
| Rabbit 4008-5037 | 92%      | 93%      |  | 95%      | 96%      |
| Rabbit 4008-4830 | 91%      | 91%      |  | 93%      | 94%      |
| Rabbit 4254-4535 | 92%      | 92%      |  | 89%      | 90%      |

Supplementary Table S4. Comparison of sequence identity and homology of Rabbit RyR1 residues 4536-4830 with equivalent RyR2 region in listed species.

| RyR2   | Rabbit RyR1 4536-4830 |          |
|--------|-----------------------|----------|
|        | identity              | homology |
| Sheep  | 63%                   | 76%      |
| Dog    | 64%                   | 76%      |
| Human  | 63%                   | 76%      |
| Rabbit | 63%                   | 75%      |
| Mouse  | 63%                   | 75%      |
